# Supplementary material
Source: PubMed Central journal article supplement (PMC8808849)
Supplement: Table_S1_full_proteomic_analysis.pdf [file Table_S1_full_proteomic_analysis.pdf]

Supplemental Table 1. Proteins present in BioCartilage listed in decreasing order of abundance.

| <b>Number</b> | <b>Protein</b>                                           | <b>ID</b> |
|---------------|----------------------------------------------------------|-----------|
| 1.            | Cartilage oligomeric matrix protein                      | P49747.2  |
| 2.            | Fibronectin                                              | P02751.4  |
| 3.            | Aggrecan core protein                                    | P16112.2  |
| 4.            | Cartilage intermediate layer protein                     | O75339.4  |
| 5.            | Collagen VI                                              | P12111.5  |
| 6.            | Prolargin                                                | P51888.1  |
| 7.            | Phospholipase A                                          | P14555.2  |
| 8.            | Clusterin                                                | P10909.1  |
| 9.            | Fibromodulin                                             | Q06828.2  |
| 10.           | Hyaluronan and proteoglycan link protein                 | P10915.2  |
| 11.           | Thrombospondin                                           | P35442.2  |
| 12.           | Chondroadherin                                           | O15335.2  |
| 13.           | Decorin                                                  | P07585.1  |
| 14.           | Biglycan                                                 | P21810.2  |
| 15.           | Matrilin                                                 | O15232.2  |
| 16.           | Fibroblast growth factor-binding protein                 | Q9BYJ0.1  |
| 17.           | Lactadherin                                              | Q08431.2  |
| 18.           | Extracellular superoxide dismutase                       | P08294.2  |
| 19.           | Lysozyme C                                               | P12109.3  |
| 20.           | Neurofilament medium polypeptide                         | P07197.3  |
| 21.           | Tenascin                                                 | P24821.3  |
| 22.           | Heparan sulfate proteoglycan                             | P98160.4  |
| 23.           | Actin                                                    | P63261.1  |
| 24.           | Ferritin light chain                                     | P02792.2  |
| 25.           | Lumican                                                  | P51884.2  |
| 26.           | Collagen XII                                             | Q99715.2  |
| 27.           | Inter-alpha-trypsin inhibitor                            | Q6UXX5.1  |
| 28.           | Mimecan                                                  | P20774.1  |
| 29.           | Proteoglycan 4                                           | Q92954.2  |
| 30.           | Serine protease HTRA1                                    | Q92743.1  |
| 31.           | Pyruvate kinase PKLR                                     | P30613.2  |
| 32.           | Glyceraldehyde-3-phosphate dehydrogenase                 | P04406.3  |
| 33.           | Sushi repeat                                             | O60687.1  |
| 34.           | Angiogenin                                               | P03950.1  |
| 35.           | Annexin                                                  | P08758.2  |
| 36.           | Histone H2B                                              | O60814.3  |
| 37.           | Procollagen C-endopeptidase enhancer                     | Q9UKZ9.1  |
| 38.           | Coagulation factor XIII                                  | P00488.4  |
| 39.           | Solute carrier organic anion transporter family membrane | Q96BD0.2  |
| 40.           | L-lactate dehydrogenase                                  | P00338.2  |
| 41.           | Angiopietin-related protein                              | O95841.1  |
| 42.           | Target of Nesh                                           | Q7Z7G0.1  |

|     |                                                       |          |
|-----|-------------------------------------------------------|----------|
| 43. | Collagen II                                           | P02458.3 |
| 44. | Leukocyte cell-derived chemotaxin                     | O75829.1 |
| 45. | Alpha-enolase                                         | P06733.2 |
| 46. | Alpha-2-macroglobulin                                 | P01023.3 |
| 47. | Apolipoprotein                                        | P05090.1 |
| 48. | Ferritin heavy chain                                  | P02794.2 |
| 49. | Phosphoglycerate kinase 2                             | P07205.3 |
| 50. | Vitronectin                                           | P04004.1 |
| 51. | Thrombospondin                                        | P35443.2 |
| 52. | Glucose-6-phosphate isomerase                         | P06744.4 |
| 53. | Ezrin                                                 | P15311.4 |
| 54. | Four and a half LIM domains protein                   | Q13642.4 |
| 55. | Arf-GAP                                               | Q9ULH1.4 |
| 56. | Elongation factor 1-alpha                             | Q05639.1 |
| 57. | EH domain-containing protein                          | Q9NZN4.2 |
| 58. | Hemoglobin                                            | P02100.2 |
| 59. | Transforming growth factor-beta-induced protein ig-h3 | Q15582.1 |
| 60. | 14-3-3 protein sigma                                  | P31947.1 |
| 61. | Complement C1q                                        | P02746.3 |
| 62. | C-type lectin                                         | Q9Y240.1 |
| 63. | Neutral alpha-glucosidase                             | Q14697.3 |
| 64. | Fructose-bisphosphate aldolase                        | P04075.2 |
| 65. | Keratin                                               | P04264.6 |
| 66. | Chondroitin sulfate proteoglycan 4                    | Q6UVK1.2 |
| 67. | Vitrin                                                | Q6UXI7.1 |
| 68. | Tumor necrosis factor receptor                        | O00300.3 |
| 69. | Complement C9                                         | P02748.2 |
| 70. | Asporin                                               | Q9BXN1.2 |
| 71. | Peroxiredoxin                                         | Q06830.1 |
| 72. | Gelsolin                                              | P06396.1 |
| 73. | Collagen X                                            | Q03692.2 |
| 74. | Serum amyloid P                                       | P02743.2 |
| 75. | Immunoglobulin heavy constant gamma                   | P01857.1 |
| 76. | Glia-derived nexin                                    | P07093.1 |
| 77. | Growth/differentiation factor 10                      | P55107.1 |
| 78. | Glycogen phosphorylase                                | P06737.4 |
| 79. | Complement C3                                         | P01024.2 |
| 80. | Prolow-density lipoprotein receptor-related protein   | Q07954.2 |
| 81. | Basigin                                               | P35613.2 |
| 82. | Alpha-1-antitrypsin                                   | P01009.3 |
| 83. | Immunoglobulin kappa constant                         | P01834.1 |
| 84. | Endoplasmin                                           | P14625.1 |
| 85. | Adhesion G-protein coupled receptor G2                | Q8IZP9.2 |
| 86. | Carbohydrate sulfotransferase                         | Q9GZS9.3 |

|      |                                                                  |          |
|------|------------------------------------------------------------------|----------|
| 87.  | Matrix Gla protein                                               | P08493.2 |
| 88.  | Fibulin                                                          | P23142.4 |
| 89.  | Ribonuclease pancreatic                                          | P07998.4 |
| 90.  | Versican core protein                                            | P13611.3 |
| 91.  | Clathrin                                                         | Q00610.5 |
| 92.  | Calmodulin                                                       | P62158.2 |
| 93.  | Superoxide dismutase                                             | P00441.2 |
| 94.  | Histone H4                                                       | P62805.2 |
| 95.  | Peptidyl-prolyl cis-trans isomerase                              | P62937.2 |
| 96.  | Antileukoproteinase                                              | P03973.2 |
| 97.  | Integrin beta-5                                                  | P18084.1 |
| 98.  | Transketolase                                                    | P29401.3 |
| 99.  | Guanine nucleotide-binding protein                               | Q5JWF2.2 |
| 100. | 1,4-alpha-glucan-branching enzyme                                | Q04446.3 |
| 101. | Myoglobin                                                        | P02144.2 |
| 102. | Carbonic anhydrase 3                                             | P07451.3 |
| 103. | Collagen XV                                                      | P39059.2 |
| 104. | Ras GTPase-activating-like protein IQGAP1                        | P46940.1 |
| 105. | Retinoic acid receptor responder protein 2                       | Q99969.1 |
| 106. | Pigment epithelium-derived factor                                | P36955.4 |
| 107. | Ribonuclease 4                                                   | P34096.3 |
| 108. | Melanoma-derived growth regulatory protein                       | Q16674.1 |
| 109. | Programmed cell death protein                                    | O75340.1 |
| 110. | Stromal cell-derived factor 1                                    | P48061.1 |
| 111. | Gremlin-1                                                        | O60565.1 |
| 112. | Glutathione peroxidase                                           | P22352.2 |
| 113. | Lymphocyte activation gene 3 protein                             | P18627.5 |
| 114. | Heat shock protein 7                                             | P48741.2 |
| 115. | POTE ankyrin domain family member J                              | P0CG39.1 |
| 116. | Plasma serine protease inhibitor                                 | P05154.3 |
| 117. | Adenylate kinase isoenzyme                                       | P00568.3 |
| 118. | 14-3-3 protein epsilon                                           | P62258.1 |
| 119. | Extracellular matrix protein 2                                   | O94769.1 |
| 120. | ATP synthase                                                     | P06576.3 |
| 121. | Cytoskeleton-associated protein 4                                | Q07065.2 |
| 122. | Histone H2A                                                      | P04908.2 |
| 123. | 40S ribosomal protein S20                                        | P60866.1 |
| 124. | EGF-like repeat and discoidin I-like domain-containing protein 3 | O43854.1 |
| 125. | 78 kDa glucose-regulated protein                                 | P11021.2 |
| 126. | Prelamin                                                         | P02545.1 |
| 127. | Ubiquitin-like modifier-activating enzyme                        | P22314.3 |
| 128. | Carboxypeptidase Q                                               | Q9Y646.1 |
| 129. | Transmembrane emp24 domain-containing protein                    | P49755.2 |
| 130. | Dolichyl-diphosphooligosaccharide--protein glycosyltransferase   | P04843.1 |

|      |                                                            |          |
|------|------------------------------------------------------------|----------|
| 131. | Glutathione S-transferase                                  | P09211.2 |
| 132. | Collagen XI                                                | P13942.5 |
| 133. | UTP-glucose-1-phosphate uridylyltransferase                | Q16851.5 |
| 134. | ATP-dependent 6-phosphofructokinase                        | P17858.6 |
| 135. | EMILIN-1                                                   | Q9Y6C2.2 |
| 136. | Cytokine-like protein 1                                    | Q9NRR1.1 |
| 137. | Galectin                                                   | P09382.2 |
| 138. | SPARC-related modular calcium-binding protein 2            | Q9H3U7.2 |
| 139. | Triosephosphate isomerase                                  | P60174.3 |
| 140. | Peroxiredoxin-6                                            | P30041.3 |
| 141. | Sulfhydryl oxidase 1                                       | O00391.3 |
| 142. | ADAMTS- 4                                                  | Q6UY14.2 |
| 143. | Tubulin beta-3 chain                                       | Q13509.2 |
| 144. | Chondroadherin-like protein                                | Q6NUI6.2 |
| 145. | Eukaryotic initiation factor 4A-III                        | P38919.4 |
| 146. | Heat shock protein 2                                       | P54652.1 |
| 147. | F-box only protein 2                                       | Q9UK22.2 |
| 148. | Leucine-rich repeat and IQ domain-containing protein 1     | Q96JM4.3 |
| 149. | Anosmin-1                                                  | P23352.3 |
| 150. | Rho GTPase-activating protein 40                           | Q5TG30.3 |
| 151. | Metalloproteinase inhibitor 3                              | P35625.2 |
| 152. | Peroxiredoxin-2                                            | P32119.5 |
| 153. | Peptidyl-prolyl cis-trans isomerase C                      | P45877.1 |
| 154. | 60S ribosomal protein L10a                                 | P62906.2 |
| 155. | Mitogen-activated protein kinase 6                         | Q16659.1 |
| 156. | Coiled-coil domain-containing protein 30                   | Q5VVM6.1 |
| 157. | Transthyretin                                              | P02766.1 |
| 158. | Complement C4-B                                            | P0C0L4.2 |
| 159. | Homeobox protein notochord                                 | A8MTQ0.2 |
| 160. | Semaphorin-3D                                              | O95025.2 |
| 161. | Transaldolase                                              | P37837.2 |
| 162. | Protein-glutamine gamma-glutamyltransferase 2              | P21980.2 |
| 163. | Coiled-coil domain-containing protein 80                   | Q76M96.1 |
| 164. | Semaphorin-3A                                              | Q14563.1 |
| 165. | Phosphoribosyl pyrophosphate synthase-associated protein 2 | O60256.1 |
| 166. | Phosphoacetylglucosamine mutase                            | O95460.3 |
| 167. | Melanotransferrin                                          | P08582.2 |
| 168. | Isocitrate dehydrogenase [NADP], mitochondrial             | P48735.2 |
| 169. | ADAMTS-3                                                   | P82987.4 |
| 170. | Carbonyl reductase [NADPH] 1                               | P16152.3 |
| 171. | EMILIN-3                                                   | Q9NT22.2 |
| 172. | Dolichyl-diphosphooligosaccharide                          | P04844.3 |
| 173. | SH3 domain-binding glutamic acid-rich-like protein         | Q9H299.1 |
| 174. | Tubulin alpha-3C/D chain                                   | Q13748.3 |

|      |                                                    |          |
|------|----------------------------------------------------|----------|
| 175. | Mitochondrial ornithine transporter 2              | Q9BXI2.3 |
| 176. | Forkhead box protein C1                            | Q12948.3 |
| 177. | Platelet-derived growth factor                     | Q9NRA1.2 |
| 178. | 3-hydroxybutyrate dehydrogenase type 2             | Q9BUT1.2 |
| 179. | Ceruloplasmin                                      | P00450.1 |
| 180. | COP9 signalosome complex subunit 3                 | Q9UNS2.3 |
| 181. | Protein S100                                       | P31949.2 |
| 182. | Peptidyl-prolyl cis-trans isomerase B              | P23284.2 |
| 183. | PH and SEC7 domain-containing protein 3            | Q9NYI0.2 |
| 184. | Laminin                                            | P55268.2 |
| 185. | Zinc finger protein 311                            | Q5JNZ3.2 |
| 186. | Phosphoglucomutase-1                               | P36871.3 |
| 187. | Protein disulfide-isomerase                        | P07237.3 |
| 188. | ATP-sensitive inward rectifier potassium channel 1 | P48048.1 |
| 189. | Multifunctional protein ADE2                       | P22234.3 |
| 190. | Fibrillin                                          | P35555.3 |
| 191. | Translocon-associated protein subunit delta        | P51571.1 |
| 192. | Cell division control protein 42 homolog           | P60953.2 |
| 193. | Fascin                                             | Q16658.3 |
| 194. | Importin                                           | Q14974.2 |
| 195. | Prothrombin                                        | P00734.2 |
| 196. | Myeloid cell nuclear differentiation antigen       | P41218.1 |
| 197. | Hexokinase-1                                       | P19367.3 |
| 198. | Myosin                                             | P35579.4 |
| 199. | CD109 antigen                                      | Q6YHK3.2 |
| 200. | Spliceosome RNA helicase DDX39B                    | Q13838.1 |
| 201. | Semaphorin-3E                                      | O15041.1 |
| 202. | Beta-hexosaminidase subunit beta                   | P07686.3 |
| 203. | Peroxiredoxin-5, mitochondrial                     | P30044.4 |
| 204. | Ras-related protein Ral-A                          | P11233.1 |
| 205. | Hyaluronan mediated motility receptor              | O75330.2 |
| 206. | Histidine-rich glycoprotein                        | P04196.1 |
| 207. | Ubiquitin carboxyl-terminal hydrolase              | Q9H0E7.2 |
| 208. | ATP-binding cassette                               | Q99758.2 |
| 209. | Glycogen debranching enzyme                        | P35573.3 |
| 210. | Collagen I                                         | P08123.7 |
| 211. | Glutamine--fructose-6-phosphate aminotransferase   | Q06210.3 |
| 212. | Pyruvate dehydrogenase kinase isozyme              | Q15118.1 |
| 213. | Protein sidekick                                   | Q58EX2.3 |
| 214. | Mitochondrial fission factor                       | Q9GZY8.1 |
